# Supplementary material for: Unveiling the roles of halogen ions in the surface passivation of CsPbI3 perovskite solar cells
Source: Royal Society of Chemistry journal article supplement (doi:10.1039/d2cp00109h), 2022-01-01
Supplement: d2cp00109h1.pdf [file d2cp00109h1.pdf]

# Unveiling Roles of Halogen Ions in Surface Passivation of CsPbI<sub>3</sub> Perovskite Solar Cells

*Shichuang Han, Li Guan<sup>\*</sup>, Tao Yin, Jianen Zhang, Jianxin Guo, Xiaobo Chen<sup>§\*</sup>, Xu  
Li<sup>\*</sup>*

† Key Laboratory of High-precision Computation and Application of Quantum Field  
Theory of Hebei Province, College of Physics Science and Technology, Hebei  
University, Baoding 071002, PR China

§Department of Chemistry, University of Missouri – Kansas City, MO 64110, USA

**Data availability.** All data generated or analyzed during this study are included in  
this published article (and its Supplementary Information files). All relevant data  
are available from the authors.

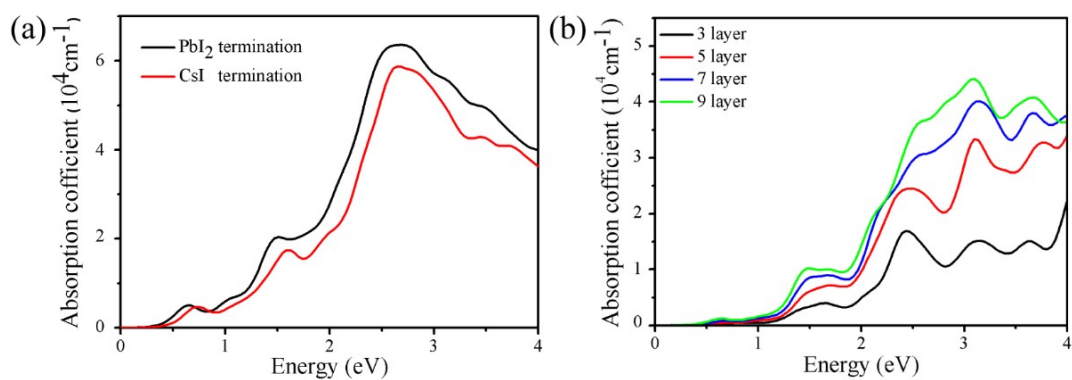

**Figure S1.** (a). Comparison of absorption spectra for  $\text{PbI}_2$  and  $\text{CsI}$  terminations of perovskites  $\text{CsPbI}_3$  (001) surface. (b). The absorption spectra of perovskite film ( $\text{PbI}_2$  terminations) with various slab thicknesses.

To maintain a stable  $\text{CsPbI}_3$  structure, the chemical potentials of Cs, Pb, and I need

satisfy the thermodynamic equilibrium condition:<sup>1</sup>

$$\Delta\mu_{\text{Cs}} + \Delta\mu_{\text{Pb}} + 3\Delta\mu_{\text{I}} = \Delta H(\text{CsPbI}_3) \quad (1)$$

$$\Delta\mu_{\text{Cs}} + \Delta\mu_{\text{I}} < \Delta H(\text{CsI}) \quad (2)$$

$$\Delta\mu_{\text{Pb}} + 2\Delta\mu_{\text{I}} < \Delta H(\text{PbI}_2) \quad (3)$$

where  $\Delta H(\text{CsPbI}_3)$ ,  $\Delta H(\text{CsI})$ ,  $\Delta H(\text{PbI}_2)$  are the formation enthalpy of  $\text{CsPbI}_3$ ,  $\text{CsI}$  and  $\text{PbI}_2$ , respectively.  $\mu_i$  represents the chemical potential of atom  $i$  ( $i=\text{Cs, Pb, I}$ ). Here  $\mu_i = \mu_i^{\text{bulk}} + \Delta\mu_i$ , where  $\mu_i^{\text{bulk}}$  is the total energy of corresponding metal or molecule. According to Eqs. (1)-(3), the chemical potential for stabilizing  $\text{CsPbI}_3$  is determined in yellow area shown as Fig S2. There are three thermodynamic equilibrium conditions (Pb-rich labeled as A, I-rich labeled as B and Moderate labeled as C) for calculating surface energy and formation energy. The used chemical potentials of Cs, Pb, I are shown in Table S2.

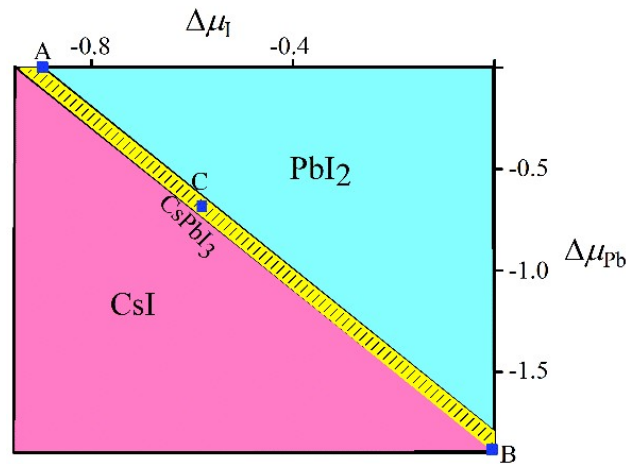

**Figure S2.** Chemical potential range for stable  $\text{CsPbI}_3$ .

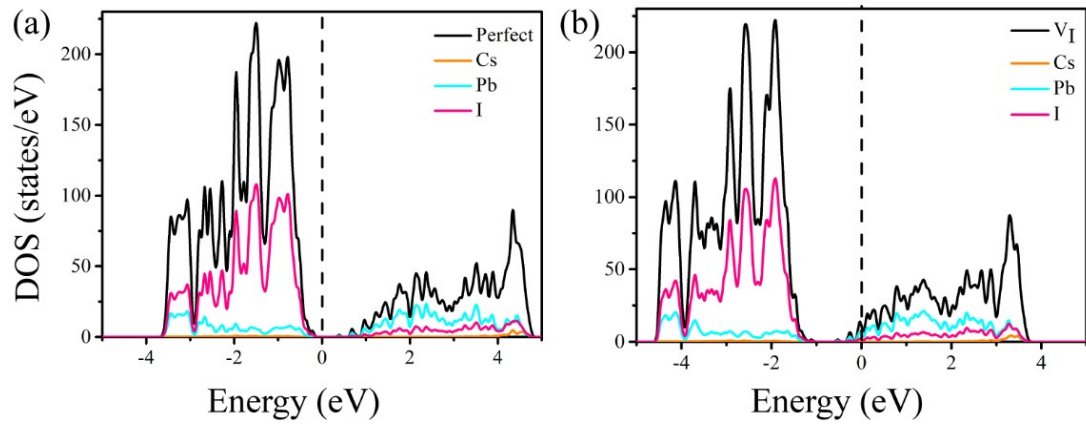

**Figure S3.** Enlarged DOSs of defect-free (a) and defective (b) CsPbI<sub>3</sub> films.

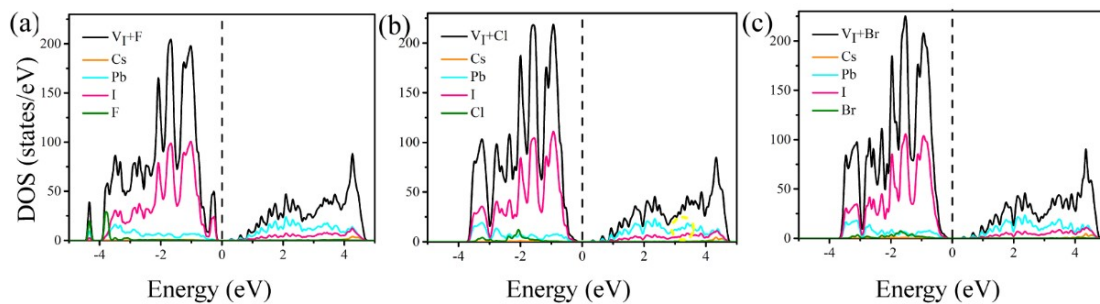

**Figure S4.** Enlarged DOSs of defective CsPbI<sub>3</sub> films passivated by halogen ions F<sup>-</sup> (a), Cl<sup>-</sup> (b), and Br<sup>-</sup> (c).

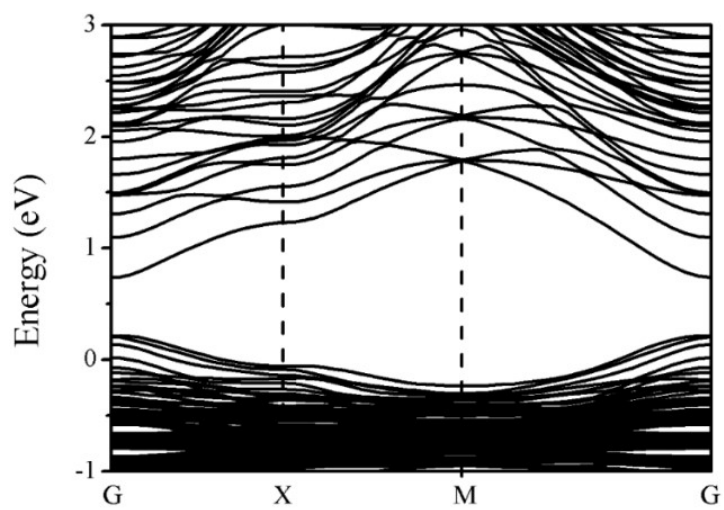

**Figure S5.** Electronic band structures of uncoordinated Pb<sup>2+</sup> passivated by F<sup>-</sup>.

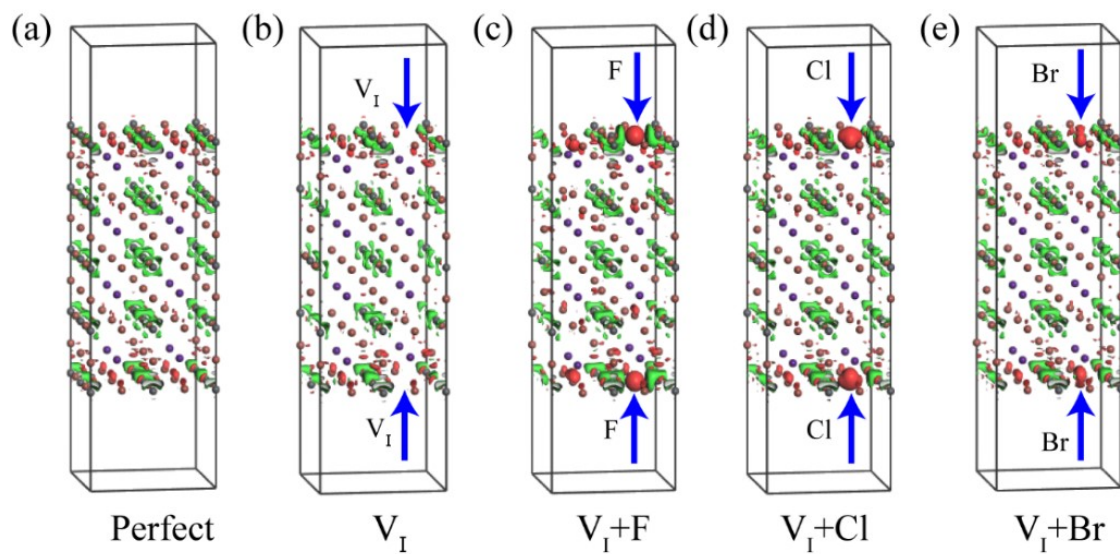

**Figure S6.** Difference charge density of perfect, defective and passivated systems. Isosurface level is  $0.00385 \text{ e/bohr}^3$ .

**Table S1.** The Value of Chemical Potential in Different Conditions.

| Conditions   | $\mu_{\text{Cs}}$ (eV) | $\mu_{\text{Pb}}$ (eV) | $\mu_{\text{I}}$ (eV) |
|--------------|------------------------|------------------------|-----------------------|
| A (Pb-rich)  | -3.14                  | -3.91                  | -2.60                 |
| B (I-rich)   | -4.05                  | -5.79                  | -1.67                 |
| C (Moderate) | -3.26                  | -4.18                  | -2.47                 |



**Table S2.** Comparison between Experimental Data and the Calculated Effective Masses of Electrons and Holes, Reduced Mass, Static Dielectric Constant and Exciton Binding Energy of bulk CsPbI<sub>3</sub>.

|                         | PBE+SOC | Exp. <sup>2,3</sup> | Theory <sup>4</sup> |       |
|-------------------------|---------|---------------------|---------------------|-------|
|                         |         |                     | GGA                 | LDA   |
| $m_e^*(m_0)$            | 0.144   |                     | 0.219               | 0.188 |
| $m_h^*(m_0)$            | 0.186   |                     | 0.190               | 0.138 |
| $\mu(m_0)$              | 0.081   | 0.014-0.214         |                     |       |
| $\epsilon_{\text{eff}}$ | 9.820   | 10                  |                     |       |
| $E_b(\text{meV})$       | 11.440  | 14-16, 21.2         |                     |       |

## REFERENCES

1. Y. Li, C. Zhang, X. Zhang, D. Huang, Q. Shen, Y. Cheng and W. Huang, *Appl. Phys. Lett.*, 2017, **111**, 162106.
2. Z. Yang, A. Surrente, K. Galkowski, A. Miyata, O. Poryugall, R. J. Sutton, A. Haghhighirad, H. J. Snaith, D. K. Maude, P. Plochocka and R. J. Nicholas, *ACS Energy Lett.*, 2017, **2**, 1621-1627.
3. Q. Zhao, A. Hazarika, L.-T. Schelhas, J. Liu, E.-A. Gaulding, G. Li, M. Zhang, M.-F. Toney, C. Sercel and J.-M. Luither, *ACS Energy Lett.*, 2020, **5**, 238-247.
4. M. Afsari, A. Boochani and M. Hantezadeh, *Optik*, 2016, **127**, 11433-11443.
